# Supplementary material for: Pyrazolo[4,3-e]tetrazolo[1,5-b][1,2,4]triazine Sulfonamides as Novel Potential Anticancer Agents: Cytotoxic and Genotoxic Activities In Vitro
Source: MDPI journal article supplement (doi:10.3390/molecules27123761), 2022-06-11
Supplement: s1 [file s1]

*Supplementary Materials*

# **Pyrazolo[4,3-*e*]tetrazolo[1,5-*b*][1,2,4]triazine Sulfonamides as Novel Potential Anticancer Agents: Cytotoxic and Genotoxic Activities In Vitro**

Karol Bukowski <sup>1,\*</sup>, Beata Marciniak <sup>1</sup>, Mateusz Kciuk <sup>1,2</sup>, Mariusz Mojzych <sup>3</sup> and Renata Kontek <sup>1</sup>

<sup>1</sup> Department of Molecular Biotechnology and Genetics, Faculty of Biology and Environmental Protection, University of Lodz, 12/16 Banacha St., 90-237 Lodz, Poland; beata.marciniak@biol.uni.lodz.pl (B.M.); mateusz.kciuk@edu.uni.lodz.pl (M.K.); renata.kontek@biol.uni.lodz.pl (R.K.)

<sup>2</sup> Doctoral School of Exact and Natural Sciences, University of Lodz, 12/16 Banacha St., 90-237 Lodz, Poland

<sup>3</sup> Department of Chemistry, Siedlce University of Natural Sciences and Humanities, 3 Maja 54, 08-110 Siedlce, Poland; mariusz.mojzych@uph.edu.pl

\* Correspondence: karol.bukowski@edu.uni.lodz.pl

Figure S1:  $^1\text{H}$ -NMR in  $\text{CDCl}_3$  for derivative 1

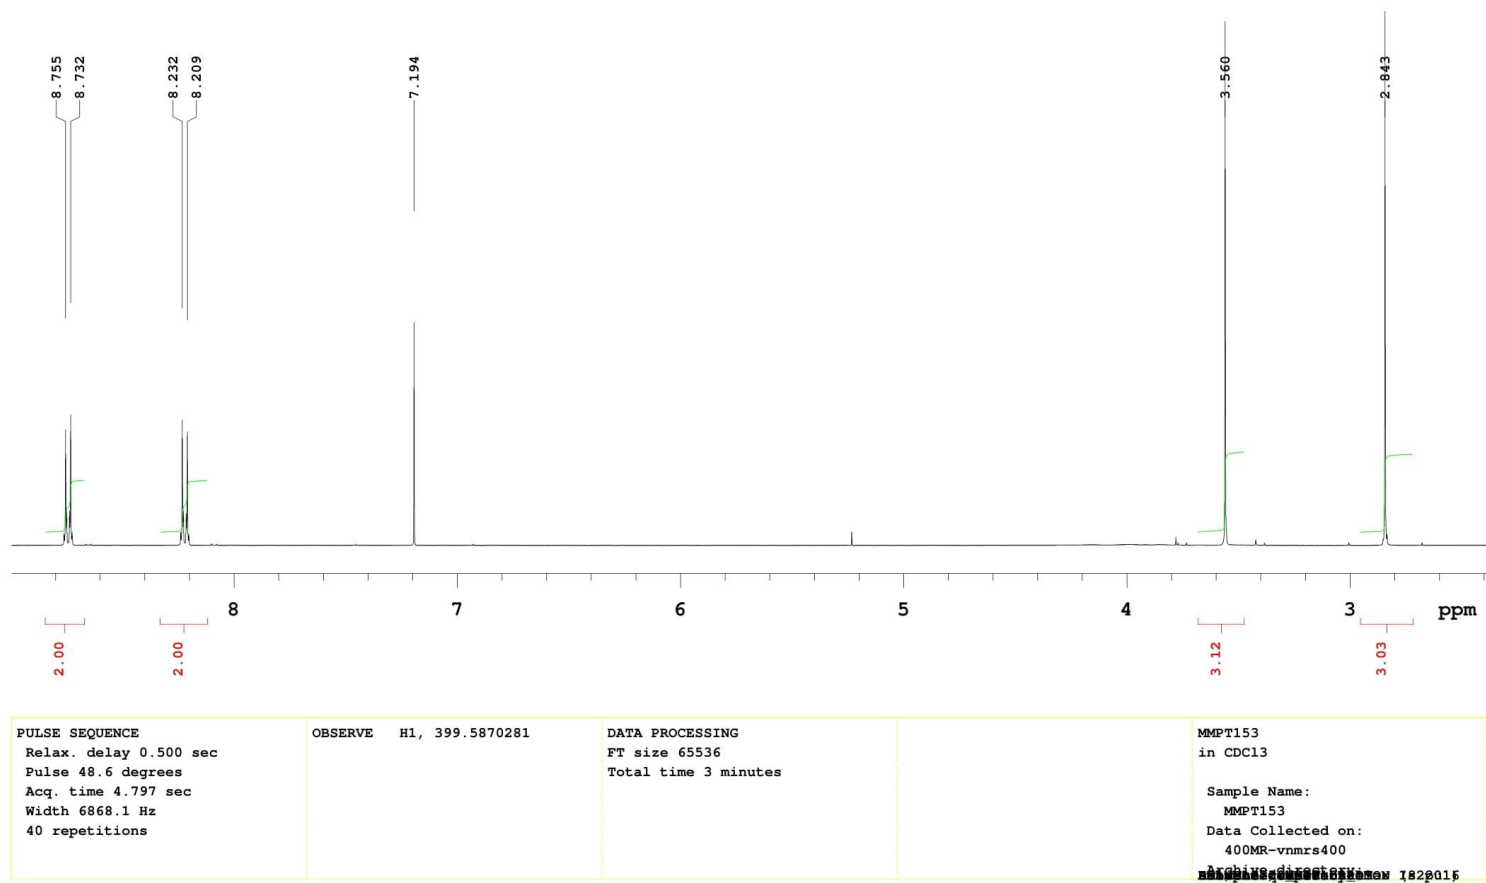

| Chemical Shift (ppm) | Integration                  |
|----------------------|------------------------------|
| 8.135 - 8.672        | 1.96                         |
| 8.140 - 8.157        | 1.99                         |
| 7.260                | 1.94                         |
| 5.300                | 2.92                         |
| 3.154 - 4.529        | 1.20, 5.38, 0.72, 3.17, 0.99 |
| 2.278                | 1.20                         |

**PULSE SEQUENCE**  
 Relax. delay 0.500 sec  
 Pulse 48.6 degrees  
 Acq. time 4.797 sec  
 Width 6793.5 Hz  
 40 repetitions

**OBSERVE** H1, 399.5428928

**DATA PROCESSING**  
 FT size 65536  
 Total time 3 minutes

**MMPT223**  
 in CDC13

Sample Name:  
 MMPT223  
 Data Collected on:  
 400MR-vnmrs400

Figure S3:  $^1\text{H}$ -NMR in acetone for derivative 2a

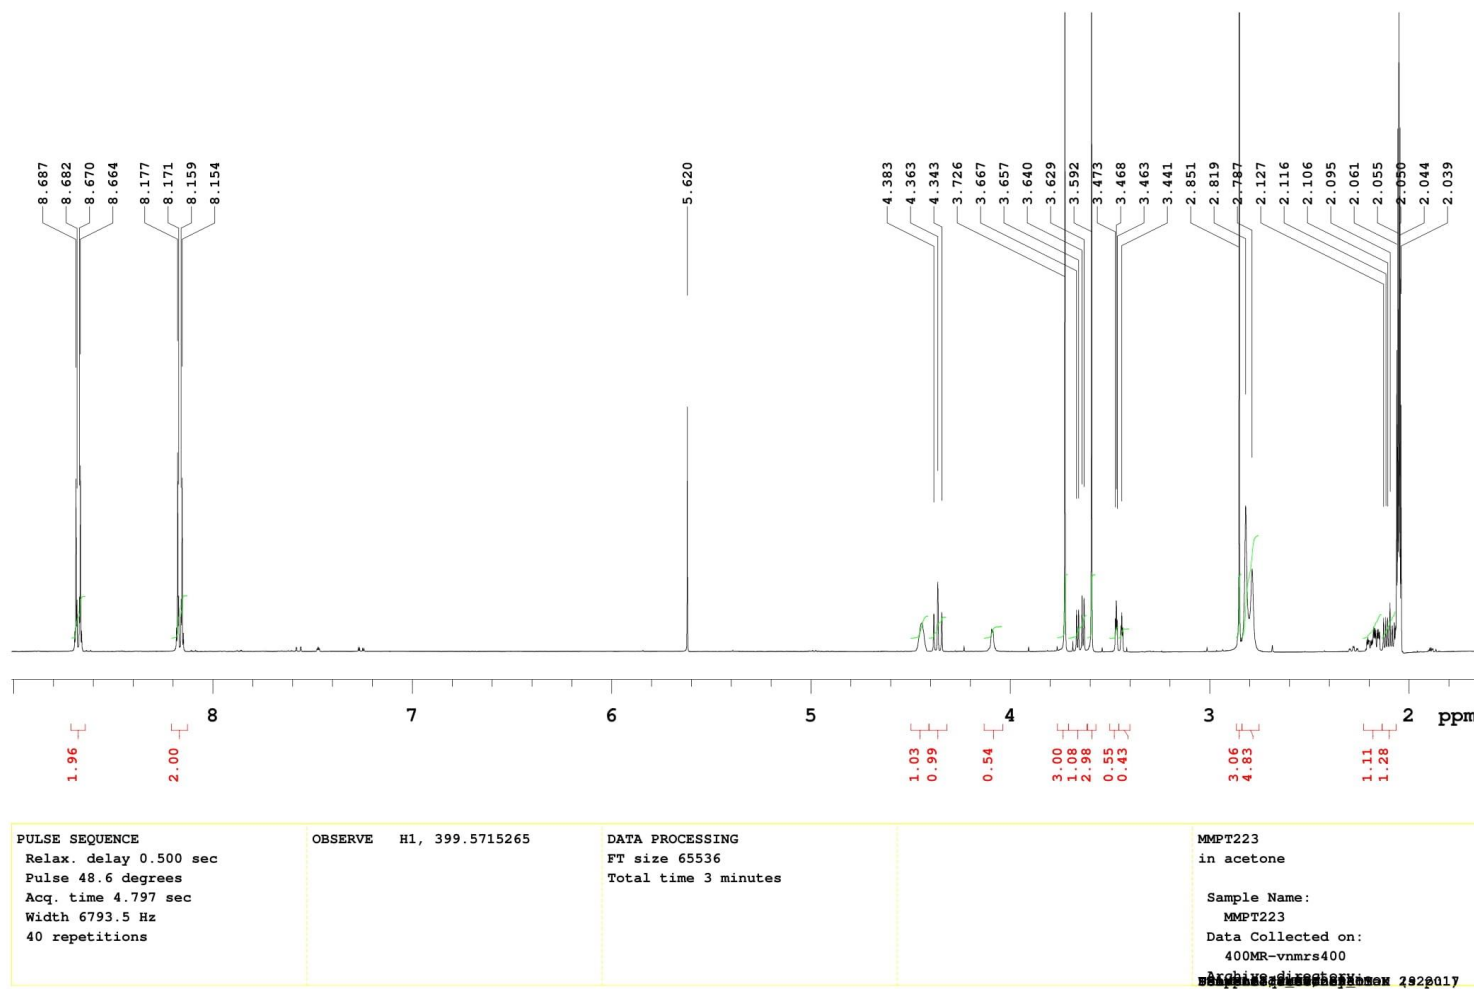

Figure S4:  $^{13}\text{C}$ -NMR in acetone for derivative 2a

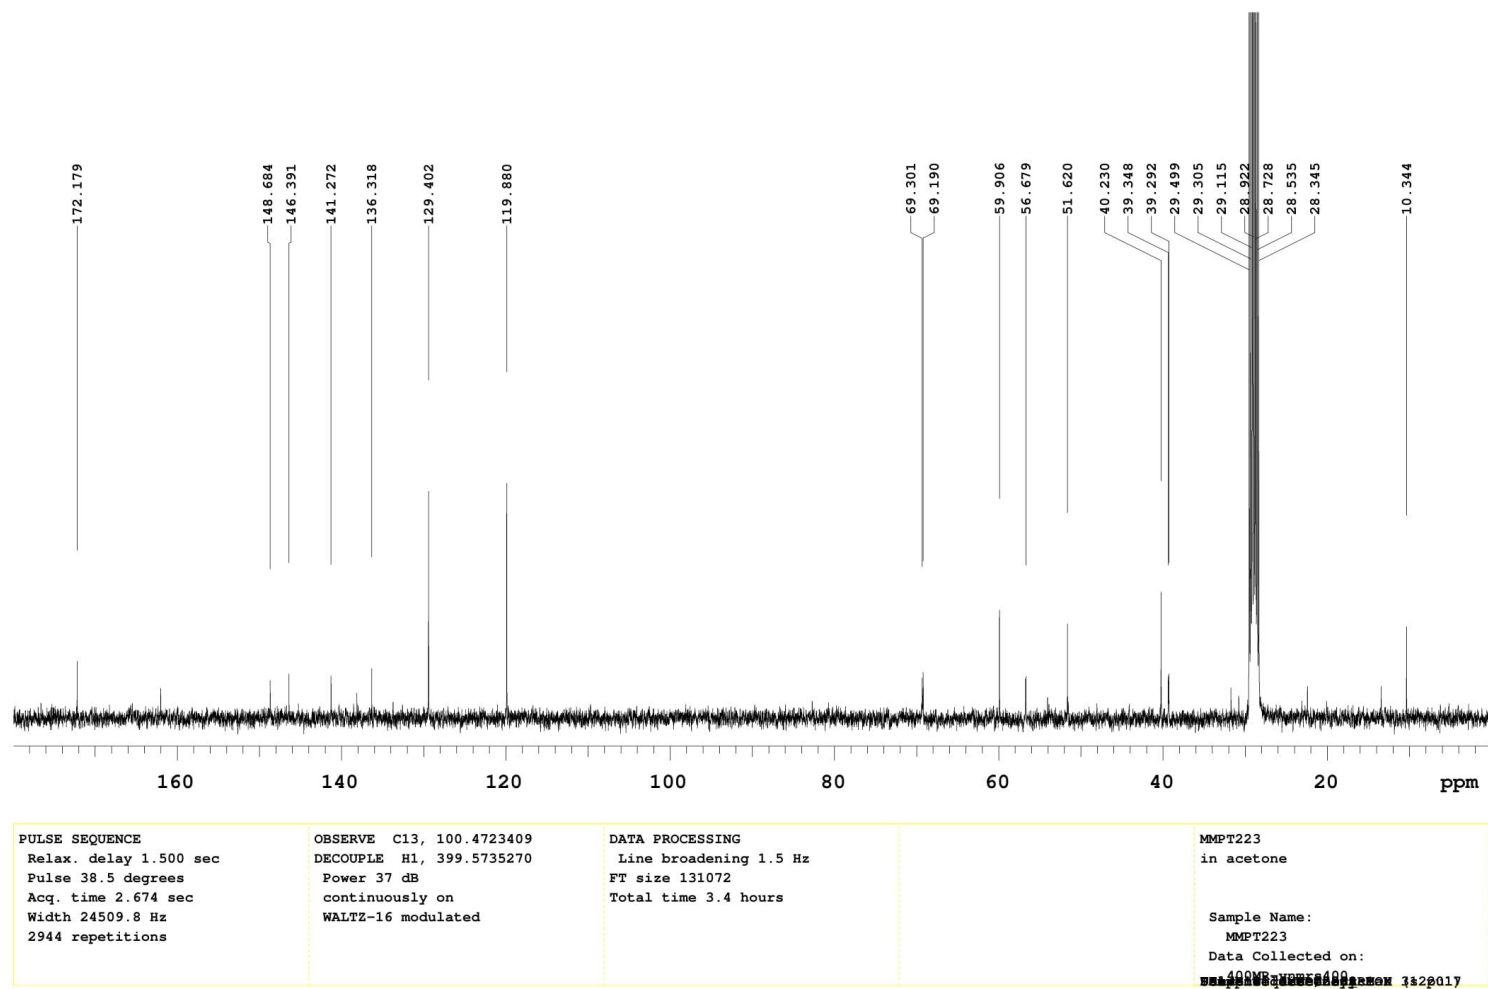

Figure S5: HRMS for derivative 2a

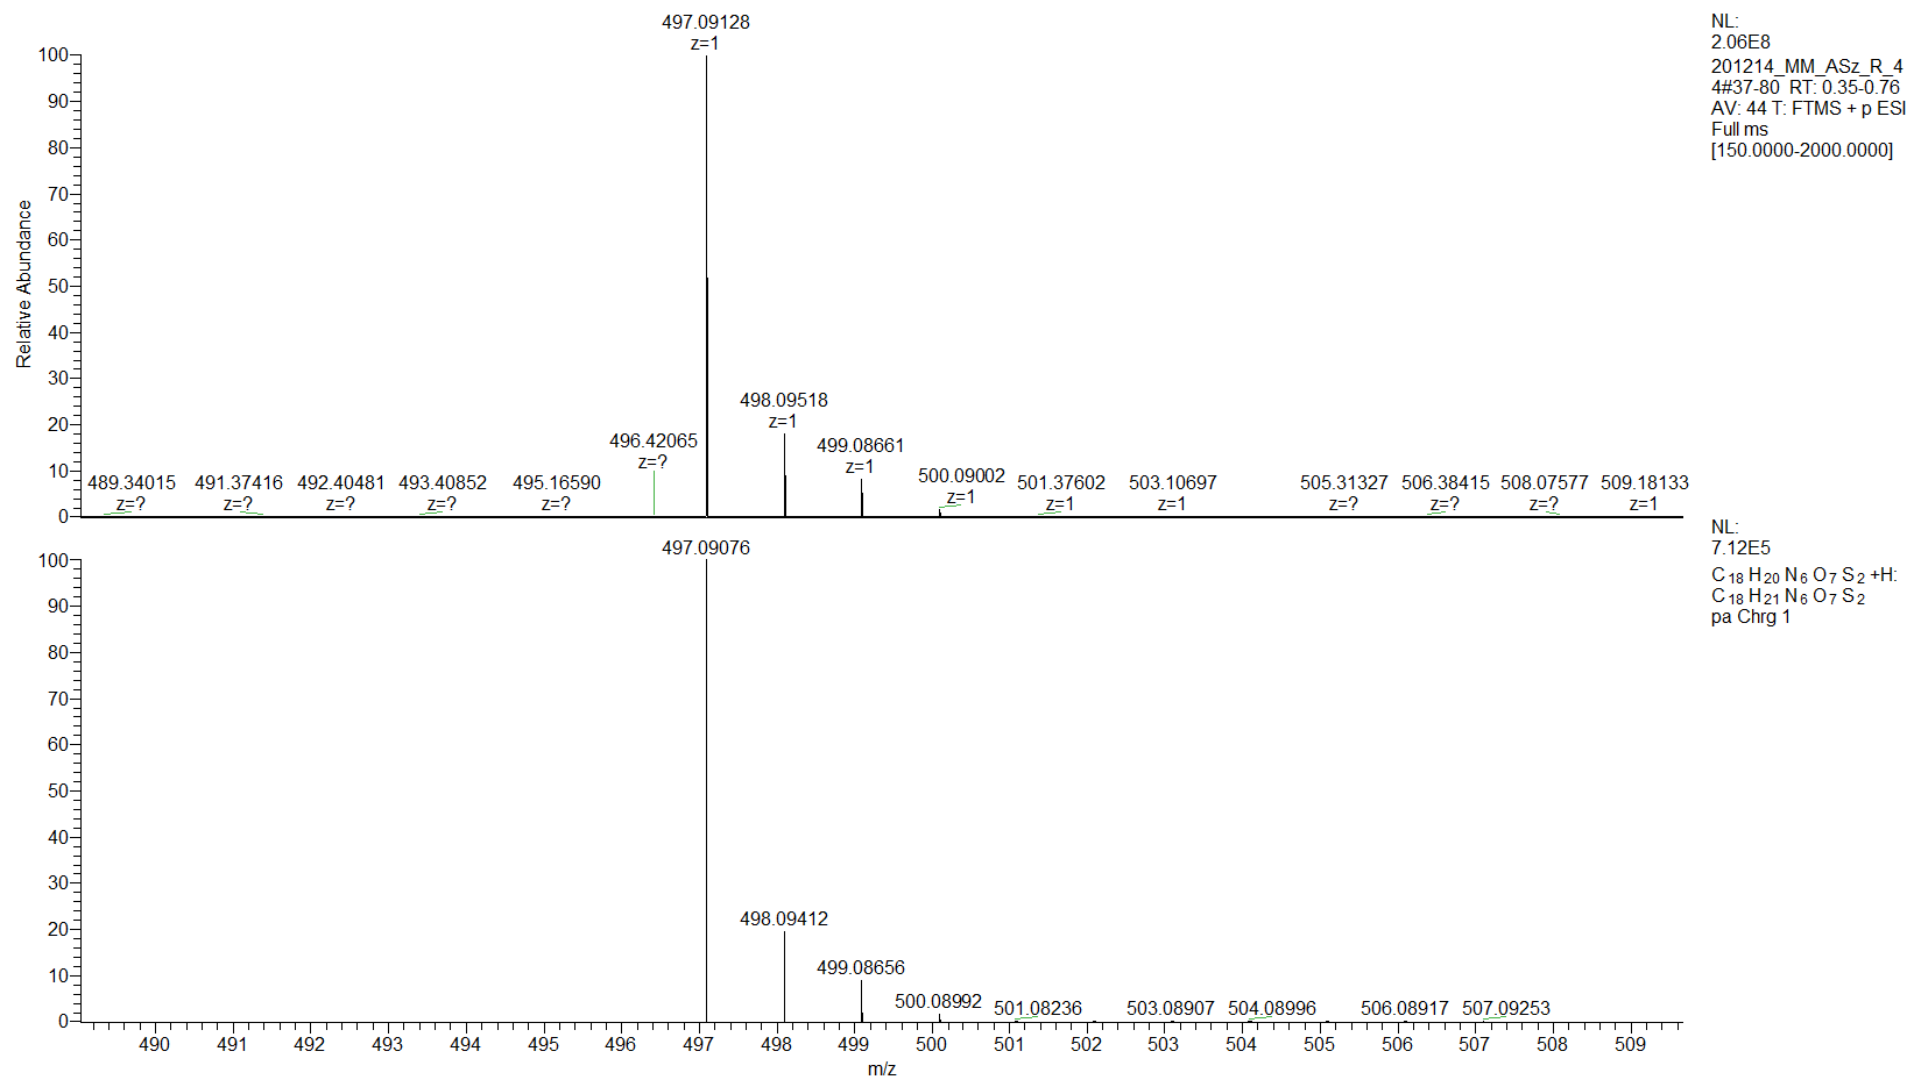

Figure S6:  $^1\text{H}$ -NMR in DMSO for derivative **2b**

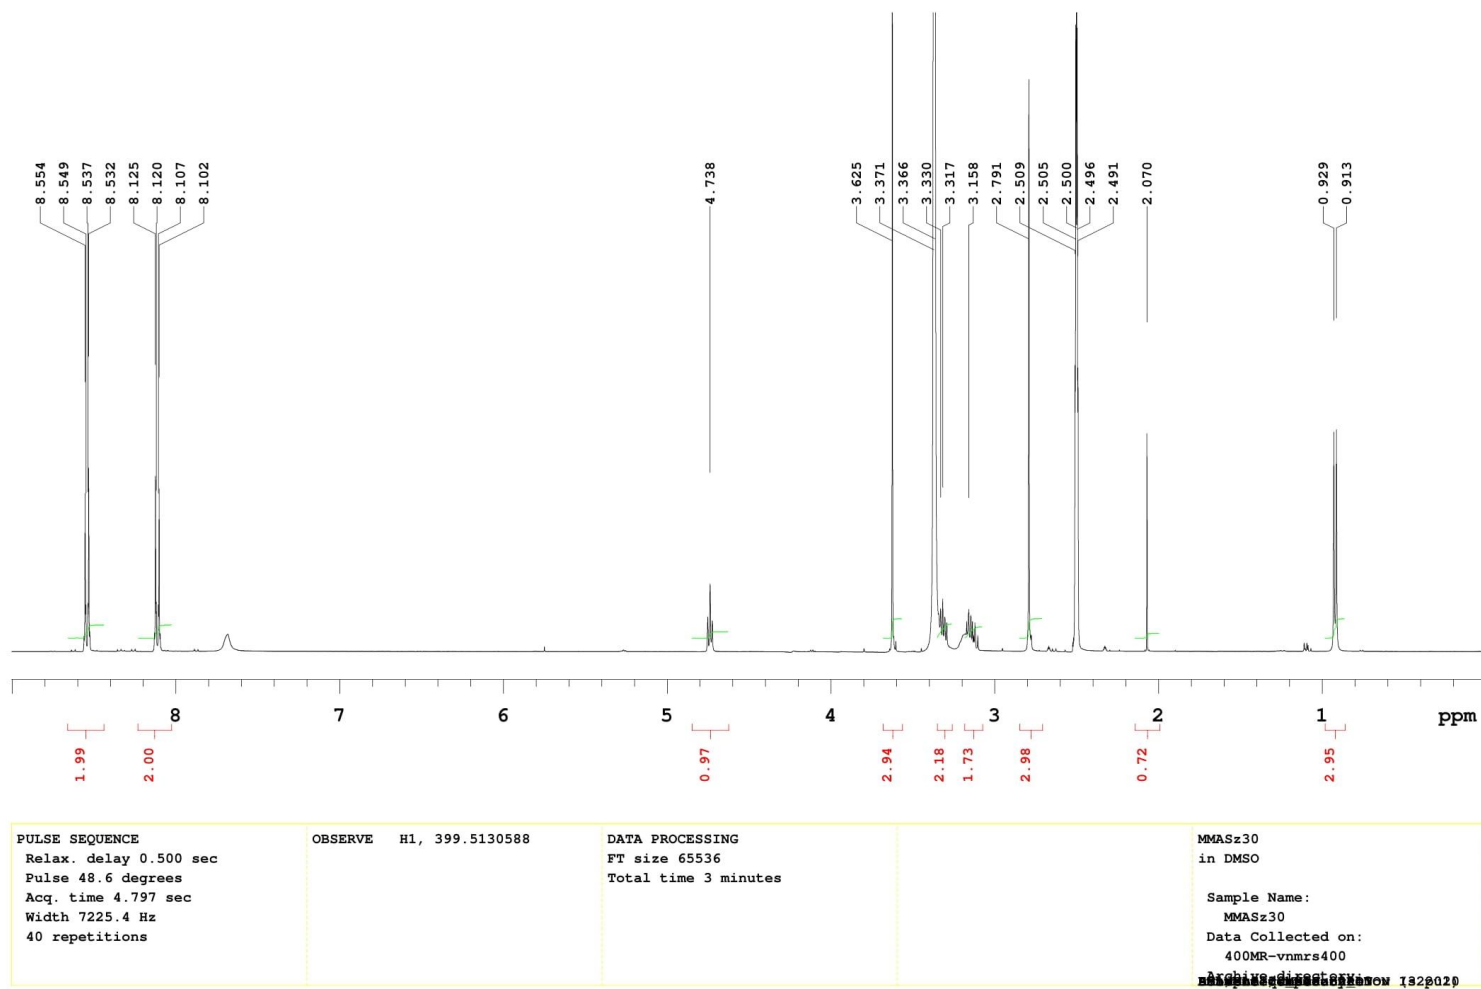

**Figure S7:**  $^1\text{H}$ -NMR for derivative **2b** in DMSO with one drop of  $\text{D}_2\text{O}$

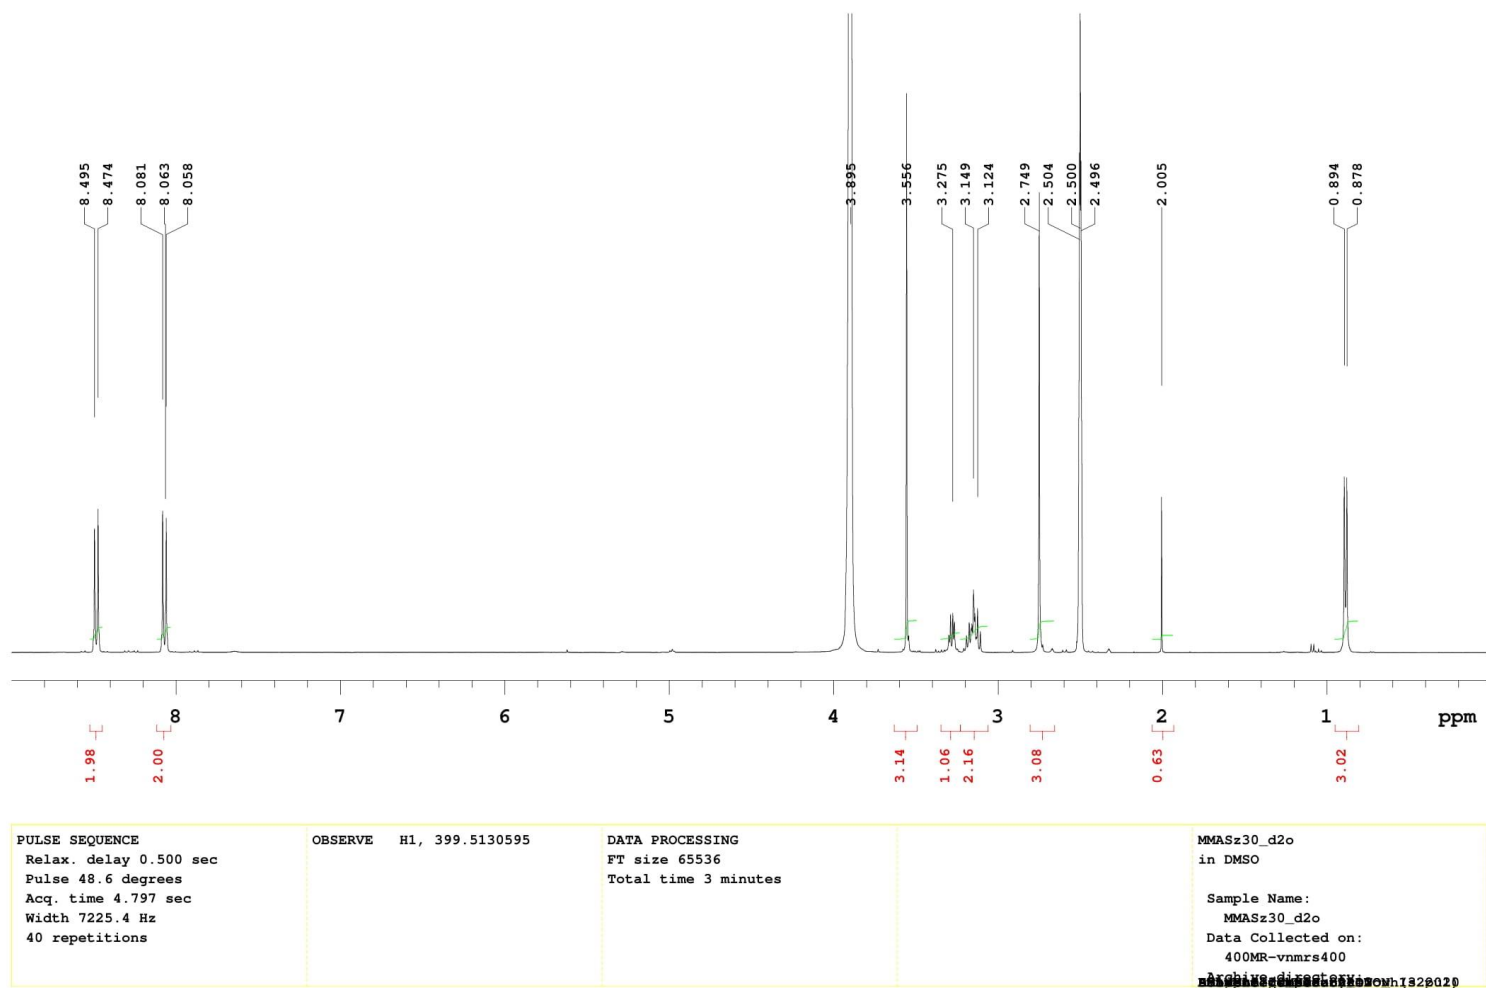



Figure S8:  $^{13}\text{C}$ -NMR for derivative **2b**

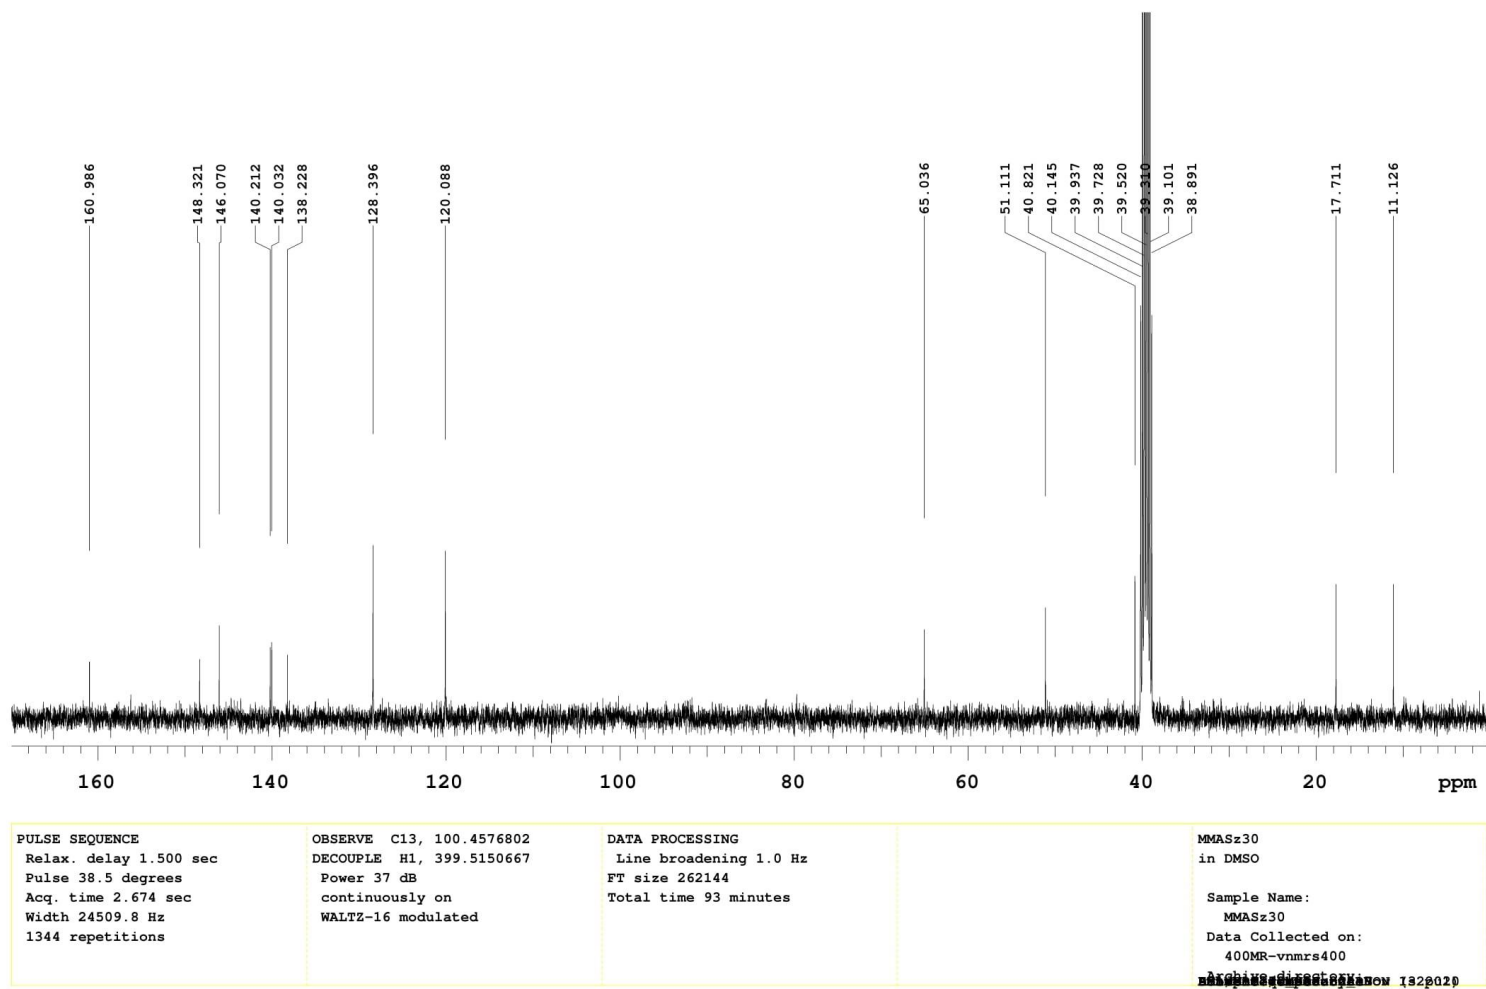

Figure S9: HRMS for 2b

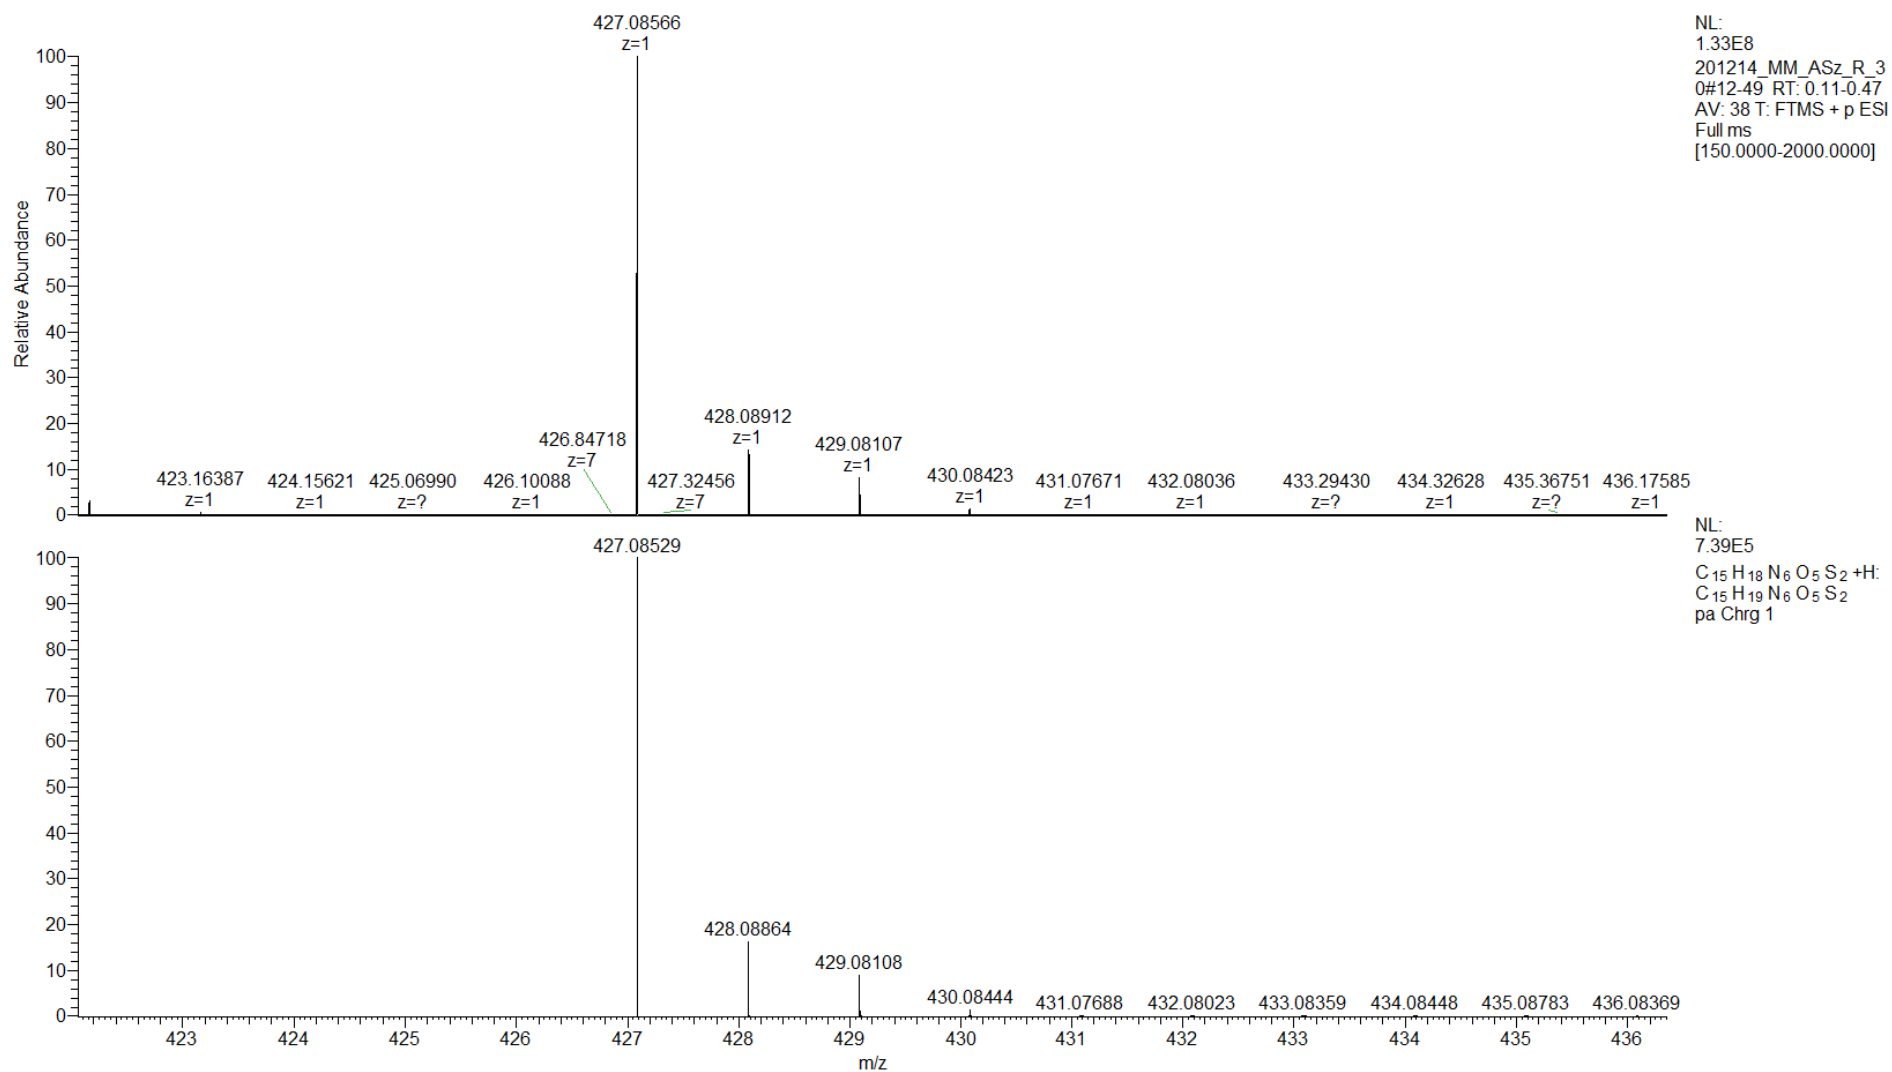

Figure S10:  $^1\text{H}$ -NMR for derivative 2c

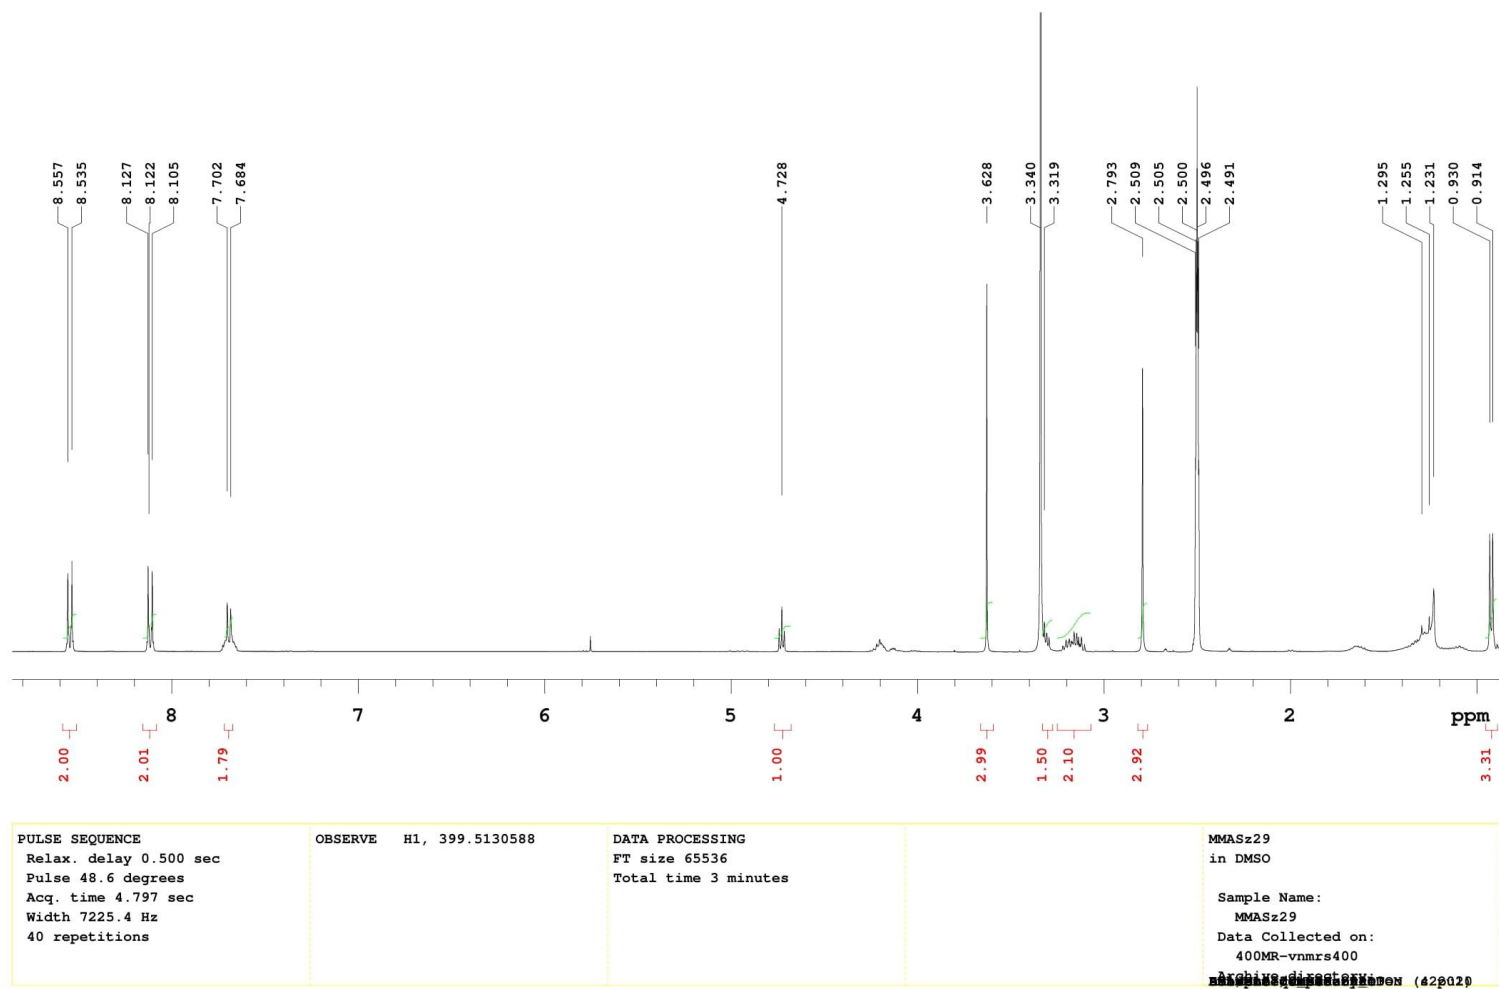

Figure S11:  $^{13}\text{C}$ -NMR for derivative 2c

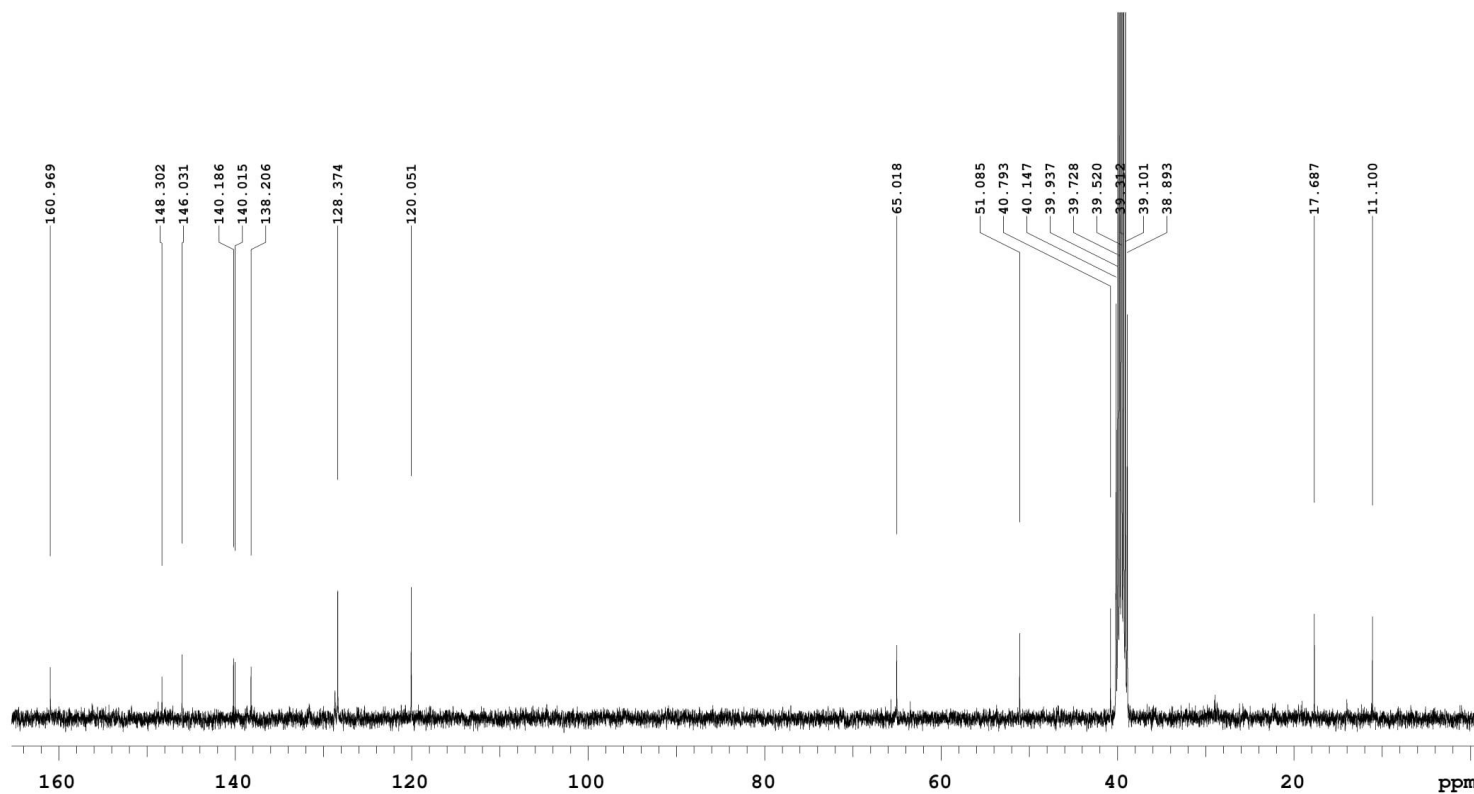

PULSE SEQUENCE  
Relax. delay 1.500 sec  
Pulse 38.5 degrees  
Acq. time 2.674 sec  
Width 24509.8 Hz  
2416 repetitions

OBSERVE C13, 100.4576830  
DECOUPLE H1, 399.5150667  
Power 37 dB  
continuously on  
WALTZ-16 modulated

DATA PROCESSING  
Line broadening 1.0 Hz  
FT size 262144  
Total time 2.8 hours

MMASz29  
in DMSO

Sample Name:  
MMASz29  
Data Collected on:  
400MR-vnmrs400

DATE: 2018-04-20 10:00:00 (428020)

Figure S12: HRMS for 2c

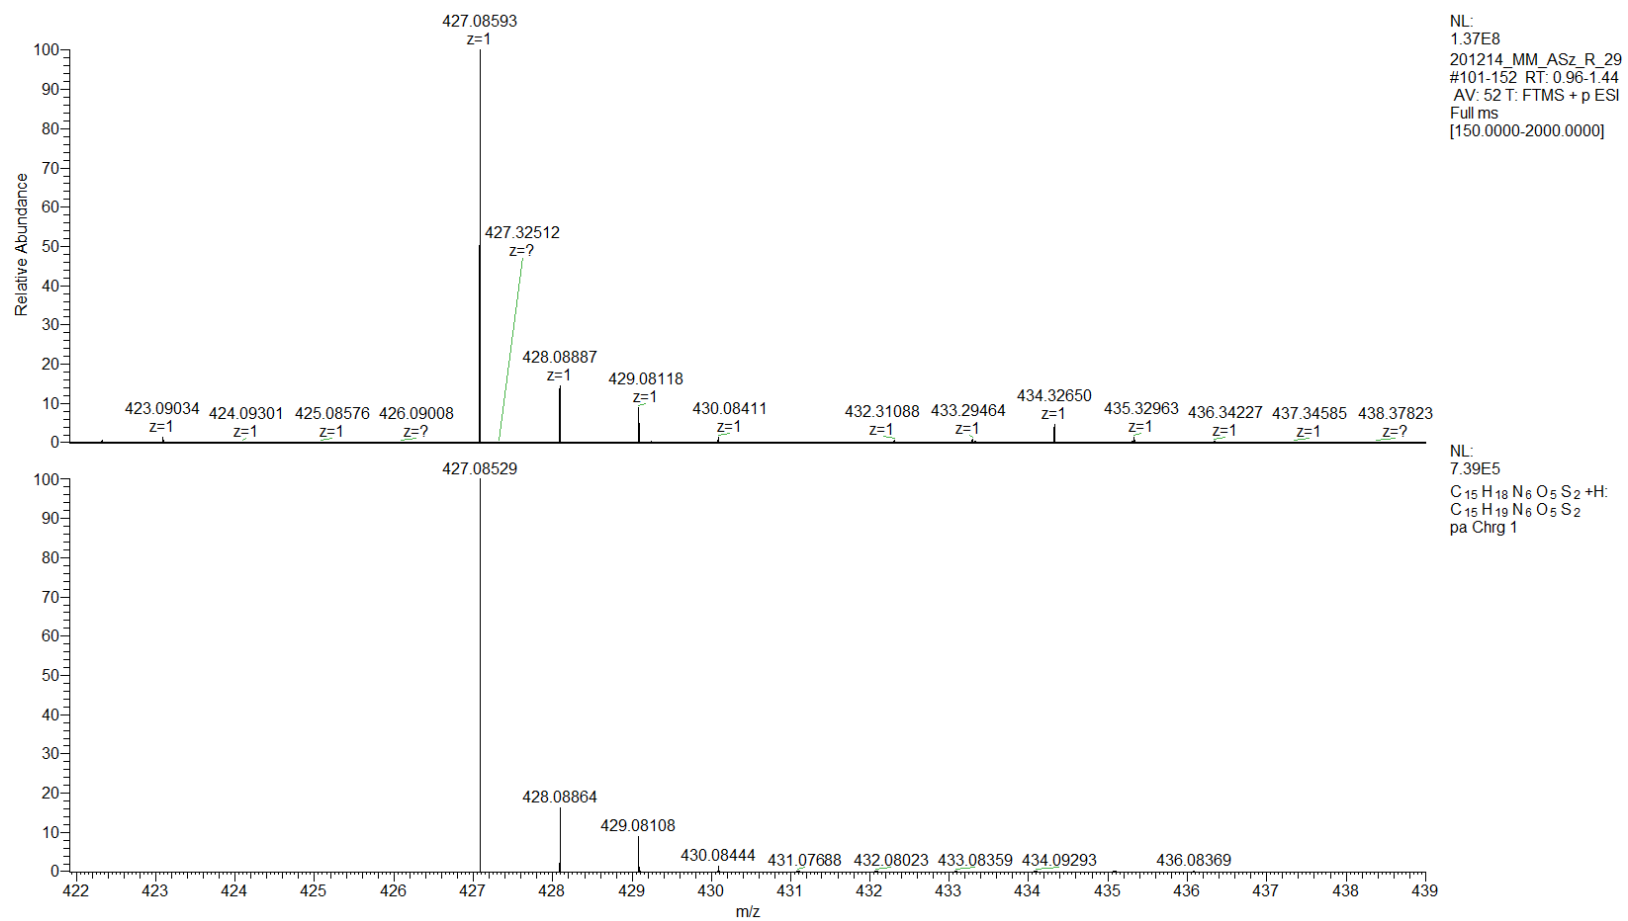

Figure S13:  $^1\text{H}$ -NMR in  $\text{MeOH-}d_4$  for derivative MM129

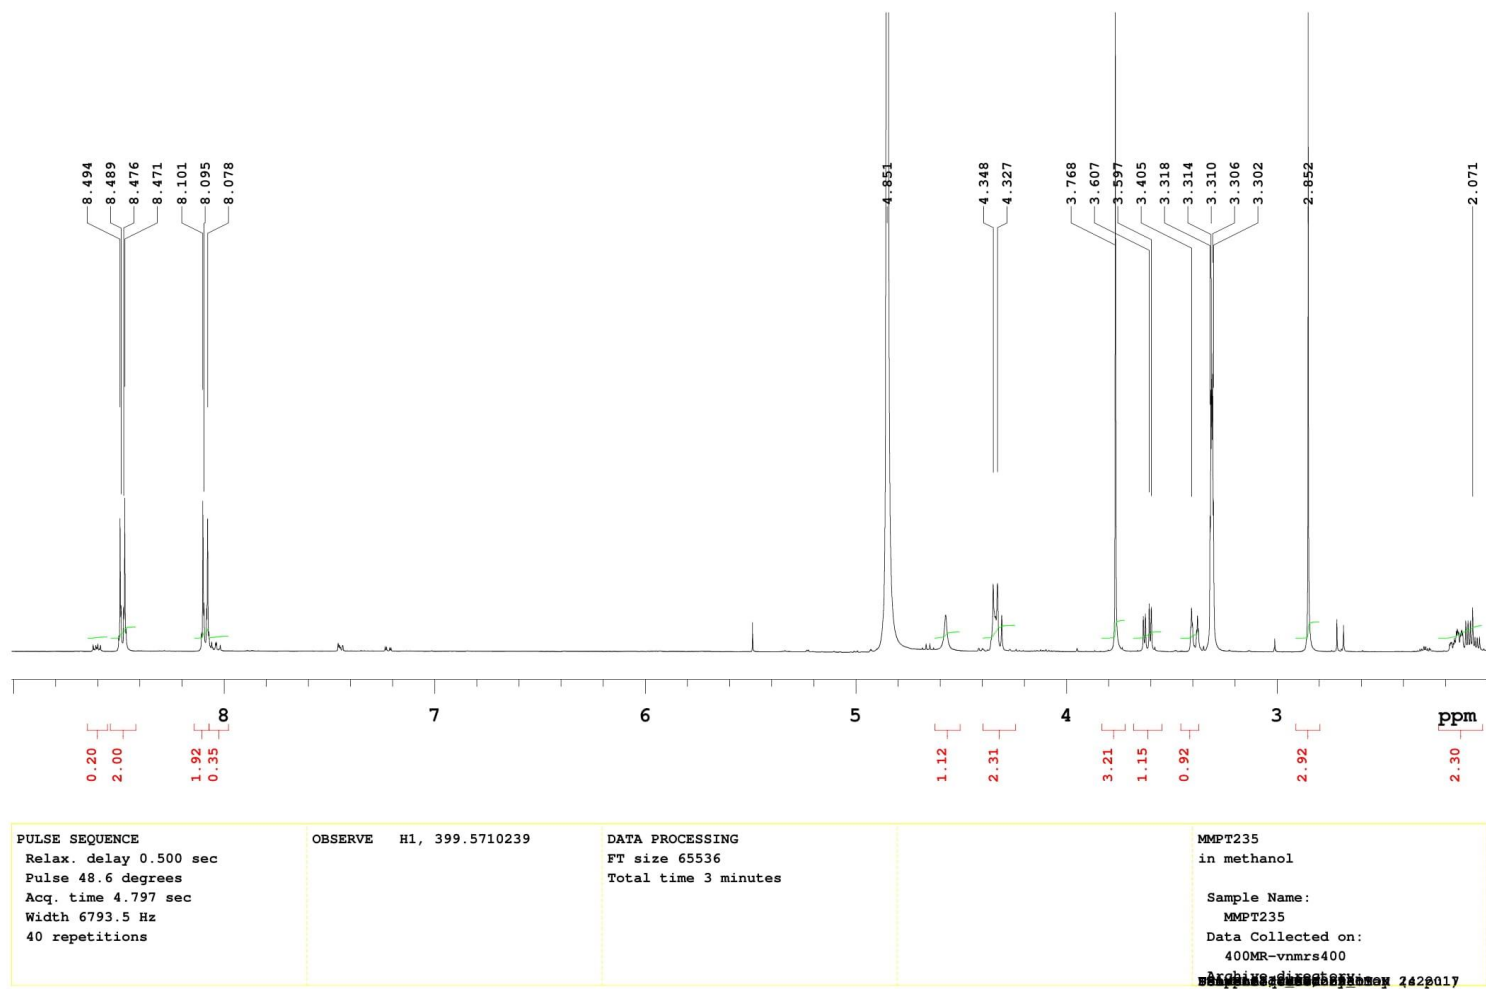

Figure S14:  $^{13}\text{C}$ -NMR in  $\text{MeOH-}d_4$  for derivative MM129

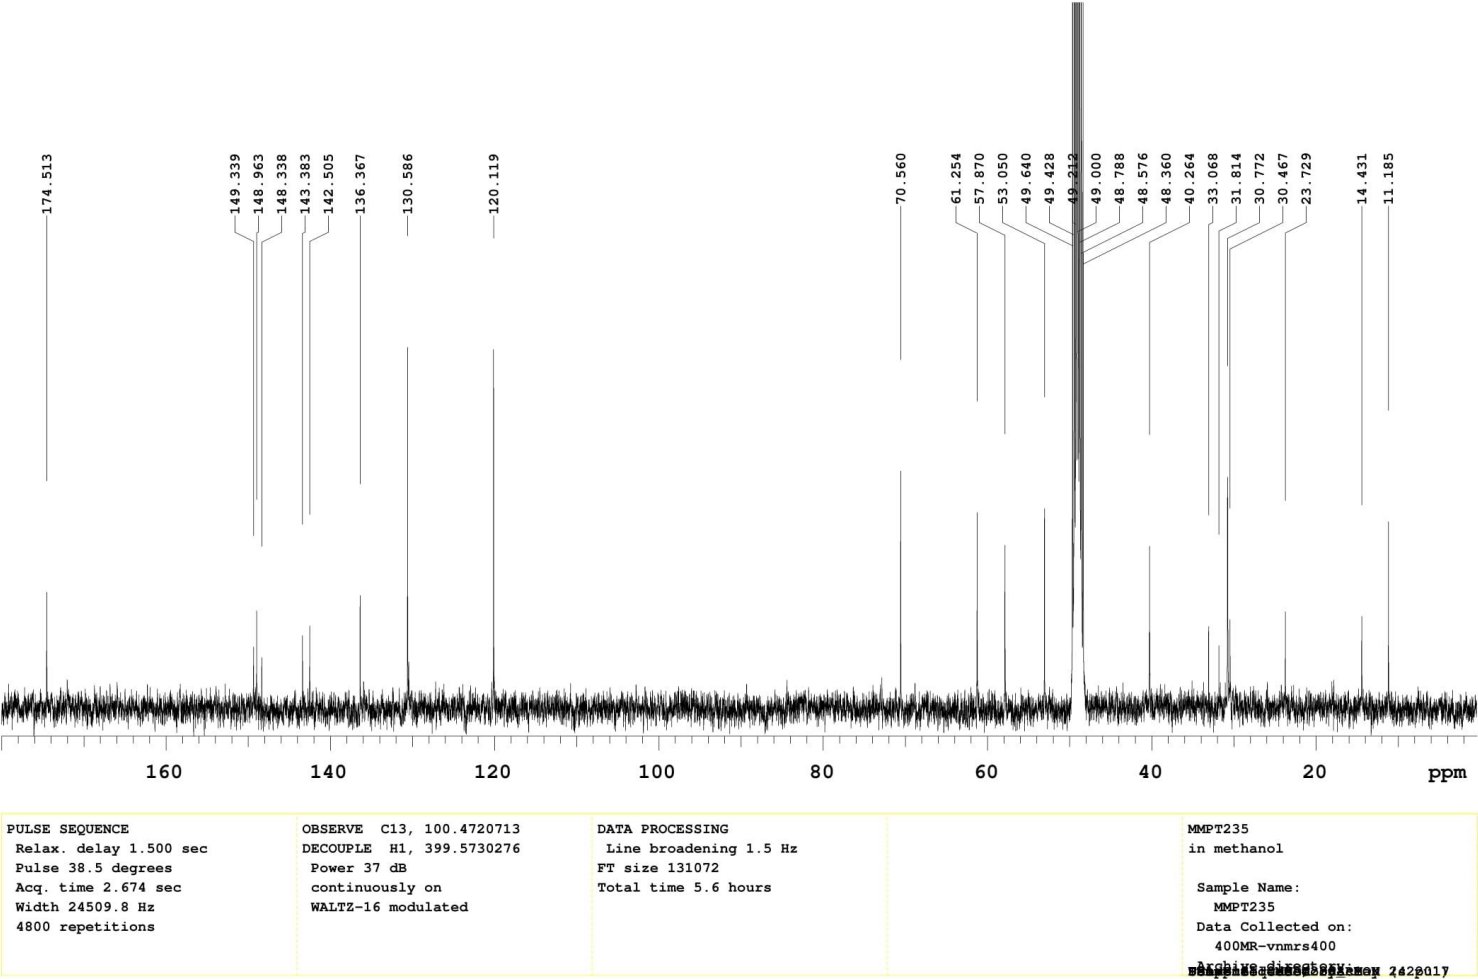

**1H NMR Spectrum Data:**

| Chemical Shift (ppm)                                   | Integration            |
|--------------------------------------------------------|------------------------|
| 8.671, 8.649                                           | 1.98                   |
| 8.156, 8.134                                           | 2.00                   |
| 7.260                                                  | -                      |
| 5.300                                                  | -                      |
| 4.528, 4.508, 4.488                                    | 2.00                   |
| 3.789, 3.682, 3.673, 3.654, 3.644, 3.619, 3.531, 3.502 | 3.01, 1.10, 2.99, 1.08 |
| 2.891                                                  | 3.00                   |
| 2.278, 2.259, 2.186, 2.175, 2.165, 2.154               | 1.08, 1.11             |

**Sample Information:**  
 Sample Name: MMPT288  
 Data Collected on: 400MR-vnmrs400

**Acquisition Parameters:**  
 PULSE SEQUENCE: Relax. delay 0.500 sec  
 Pulse 48.6 degrees  
 Acq. time 4.797 sec  
 Width 6793.5 Hz  
 32 repetitions

**Processing Parameters:**  
 OBSERVE H1, 399.5428928  
 DATA PROCESSING: FT size 65536  
 Total time 2 minutes



Figure S16:  $^1\text{H}$ -NMR in  $\text{MeOH-}d_4$  for derivative MM130

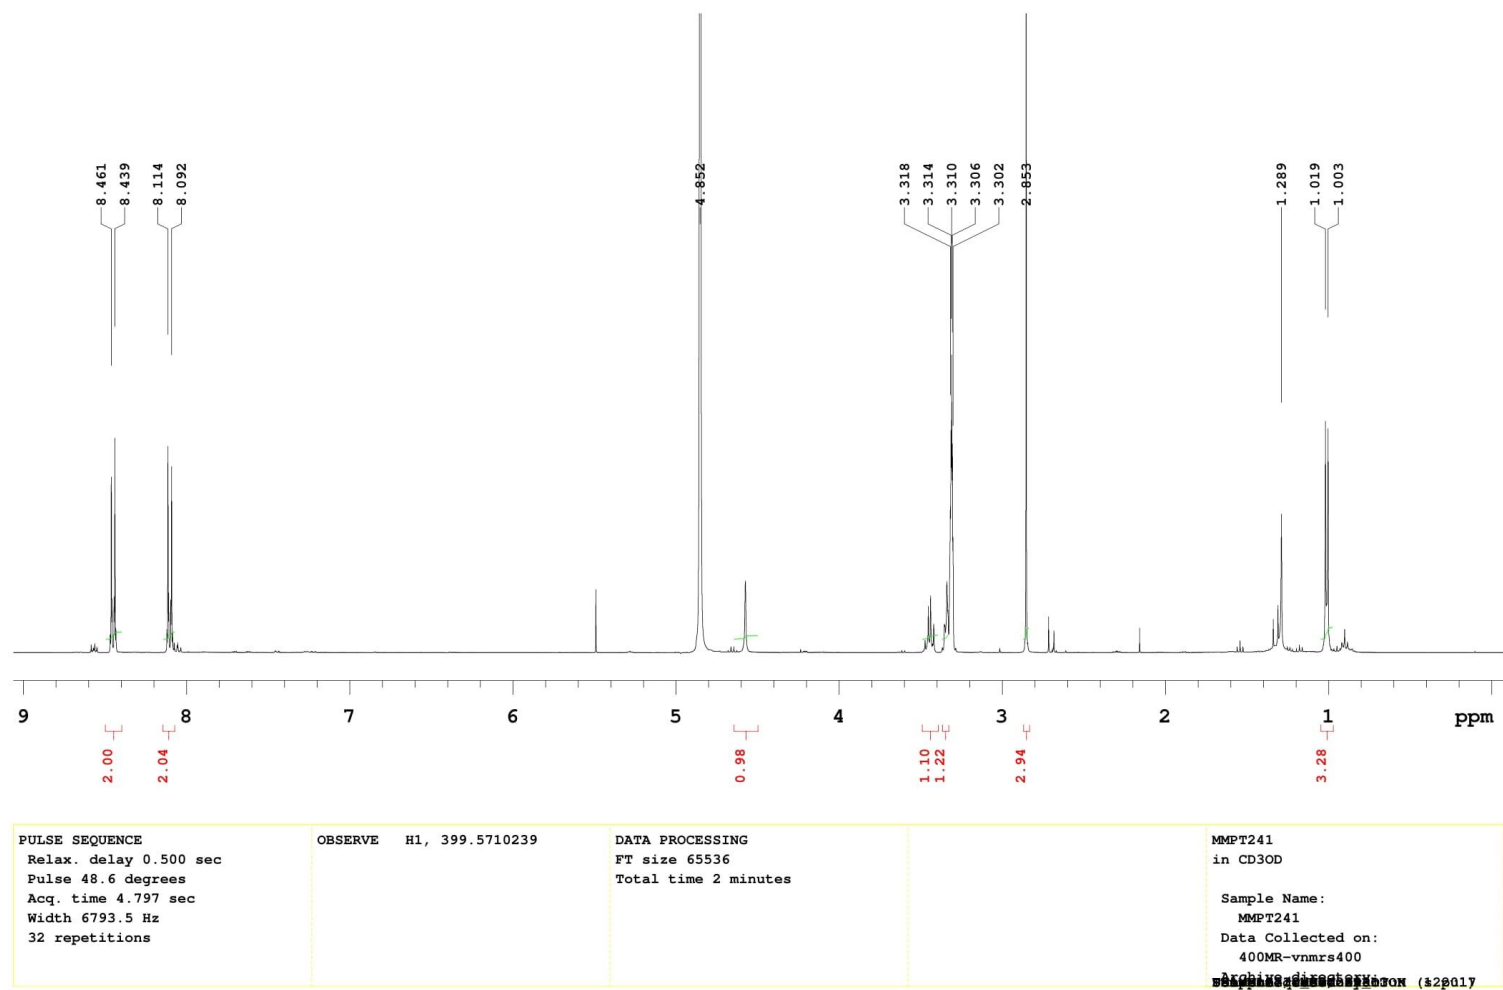

Figure S17:  $^{13}\text{C}$ -NMR in  $\text{MeOH-}d_4$  for derivative MM130

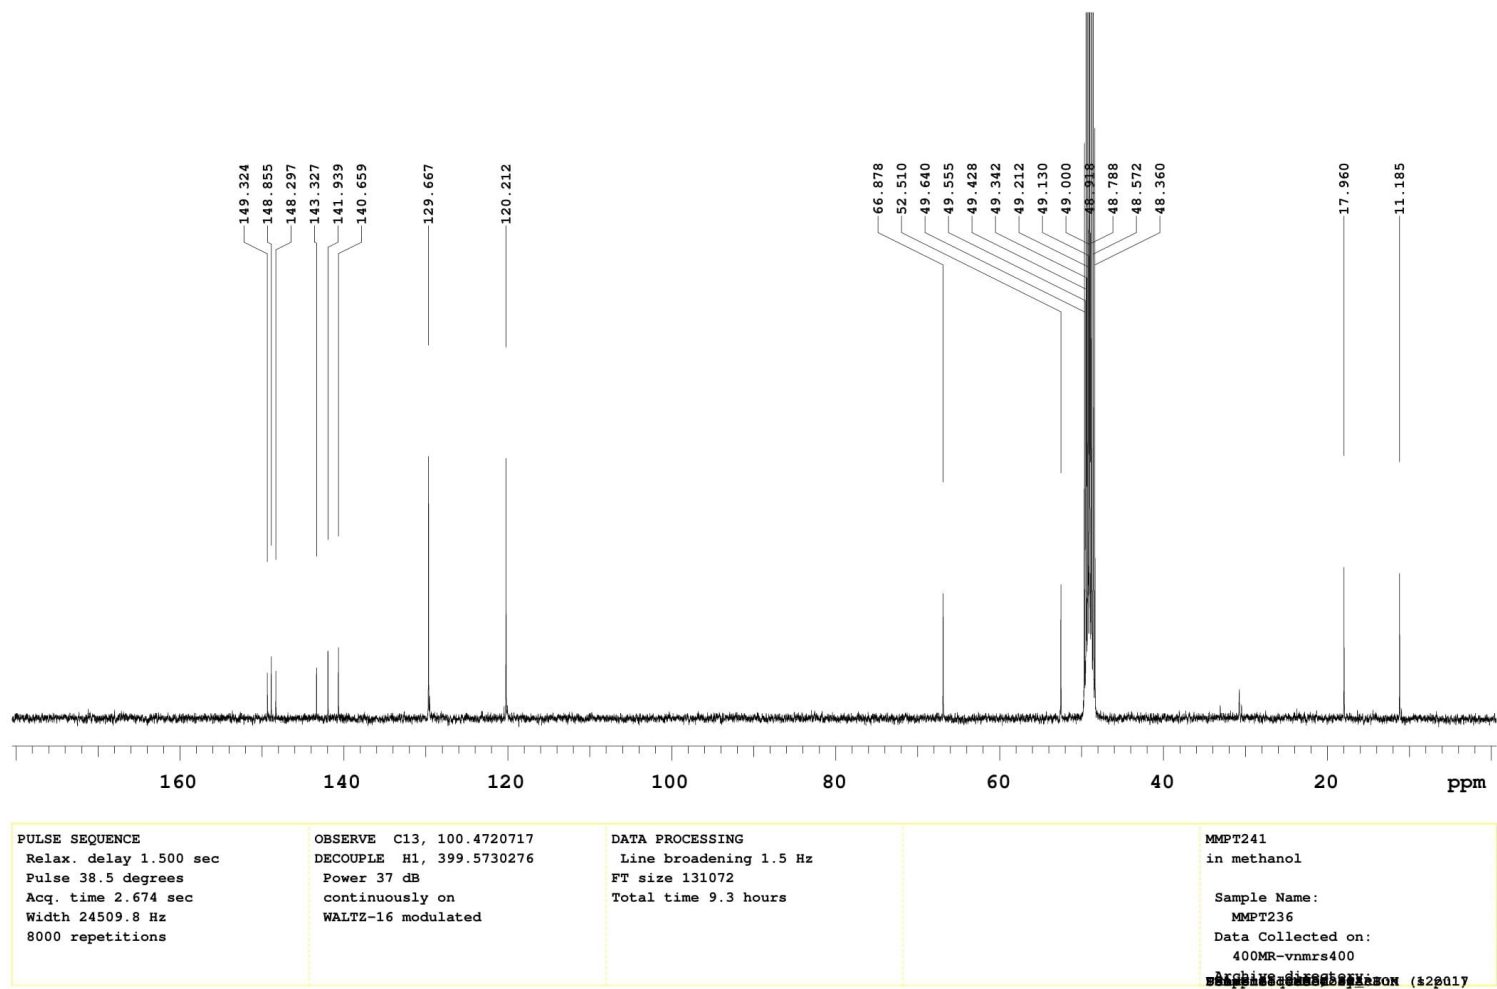

1H NMR spectrum of MMPT233 in methanol. The spectrum shows peaks from 2.8 to 8.5 ppm. Integration values are shown below the peaks: 1.93, 2.00, 0.66, 1.01, 2.04, 0.41, 0.57, 0.24, 3.00. Peak labels are at the top: 8.471, 8.465, 8.453, 8.448, 8.103, 8.098, 8.086, 8.081, 5.491, 4.850, 4.573, 3.674, 3.661, 3.658, 3.644, 3.498, 3.488, 3.485, 3.473, 3.318, 3.314, 3.310, 3.306, 3.302, 3.092, 3.079, 3.058, 3.046, 2.902, 2.885, 2.869, 2.853. The x-axis is labeled 'ppm'.

| Chemical Shift (ppm) | Integration |
|----------------------|-------------|
| 8.471                | 1.93        |
| 8.465                | 1.93        |
| 8.453                | 1.93        |
| 8.448                | 1.93        |
| 8.103                | 2.00        |
| 8.098                | 2.00        |
| 8.086                | 2.00        |
| 8.081                | 2.00        |
| 5.491                | 0.66        |
| 4.850                | 0.66        |
| 4.573                | 0.66        |
| 3.674                | 1.01        |
| 3.661                | 1.01        |
| 3.658                | 1.01        |
| 3.644                | 1.01        |
| 3.498                | 1.01        |
| 3.488                | 1.01        |
| 3.485                | 1.01        |
| 3.473                | 1.01        |
| 3.318                | 2.04        |
| 3.314                | 2.04        |
| 3.310                | 2.04        |
| 3.306                | 2.04        |
| 3.302                | 2.04        |
| 3.092                | 0.41        |
| 3.079                | 0.41        |
| 3.058                | 0.41        |
| 3.046                | 0.41        |
| 2.902                | 0.57        |
| 2.885                | 0.57        |
| 2.869                | 0.24        |
| 2.853                | 0.24        |

**PULSE SEQUENCE**  
Relax. delay 0.500 sec  
Pulse 48.6 degrees  
Acq. time 4.797 sec  
Width 6793.5 Hz  
40 repetitions

**OBSERVE** H1, 399.5710239

**DATA PROCESSING**  
FT size 65536  
Total time 3 minutes

**MMPT233**  
in methanol

**Sample Name:**  
MMPT233  
Data Collected on:  
400MR-vnmrs400

2429017

| Region              | Chemical Shift (ppm)                                 | Assignment                         |
|---------------------|------------------------------------------------------|------------------------------------|
| Aromatic/Quaternary | 149.324, 148.885, 148.304, 143.339, 142.043, 139.341 | Aromatic and quaternary carbons    |
| Aliphatic           | 129.775, 120.264                                     | Aliphatic carbons                  |
| Methoxy             | 3.8                                                  | Methoxy group (-OCH <sub>3</sub> ) |
| Methine             | 4.6                                                  | Methine group (-CH-)               |
| Solvent             | 49.0                                                 | Methanol (CD <sub>3</sub> OH)      |
| Methyl              | 11.2                                                 | Methyl group (-CH <sub>3</sub> )   |

**PULSE SEQUENCE**  
 Relax. delay 1.500 sec  
 Pulse 38.5 degrees  
 Acq. time 2.674 sec  
 Width 24509.8 Hz  
 1328 repetitions

**OBSERVE** C13, 100.4720717  
 DECOUPLE H1, 399.5730276  
 Power 37 dB  
 continuously on  
 WALTZ-16 modulated

**DATA PROCESSING**  
 Line broadening 1.5 Hz  
 FT size 131072  
 Total time 92 minutes

**MMPT233**  
 in methanol

Sample Name:  
 MMPT233  
 Data Collected on:  
 400MR-vnmrs400
